# Supplementary material for: A Well-Established Gut Microbiota Enhances the Efficiency of Nutrient Metabolism and Improves the Growth Performance of Trachinotus ovatus
Source: MDPI journal article supplement (doi:10.3390/ijms25105525), 2024-05-18
Supplement: s1 [file s1]

Supplementary Table S1 DEGs associated with cell growth in the intestines of *T. ovatus* in the antibiotic-treated and control groups

| Gene name     | Function annotation                                        | TB vs CB |
|---------------|------------------------------------------------------------|----------|
| <i>socs1</i>  | Suppressor of cytokine signaling 1 (SOCS1)                 | up       |
| <i>cdkn1a</i> | Cyclin-dependent kinase inhibitor 1 (CDKN1A/P21)           | up       |
| <i>mapk1</i>  | mitogen-activated protein kinase 1 (MAPK1)                 | down     |
| <i>kras</i>   | GTPase KRas (KRAS)                                         | down     |
| <i>sos1</i>   | Son of sevenless homolog 1 (SOS1)                          | down     |
| <i>shc1</i>   | SHC-transforming protein 1 (SHC1)                          | down     |
| <i>jak2</i>   | Janus kinase 2 (JAK2)                                      | down     |
| <i>ghr</i>    | Growth hormone receptor (GHR)                              | down     |
| <i>stat3</i>  | Signal transducer and activator of transcription 3 (STAT3) | down     |
| <i>egfr</i>   | Epidermal growth factor receptor (EGFR)                    | down     |

Supplementary Table S2 Quality assessment and comparison rate analysis of transcriptome data

| Sample   | Raw reads | Clean reads | Clean bases | Q20(%) | Q30(%) | GC content(%) | Total mapped(%) |
|----------|-----------|-------------|-------------|--------|--------|---------------|-----------------|
| TB_60d_1 | 42285646  | 41585244    | 6162702317  | 97.14  | 92.08  | 51.98         | 93.41%          |
| TB_60d_2 | 46724810  | 46142572    | 6820776513  | 97.17  | 92.18  | 50.51         | 93.14%          |
| TB_60d_3 | 39924258  | 39401806    | 5844522686  | 97.14  | 92.05  | 52.63         | 92.89%          |
| CB_60d_1 | 44356266  | 43690662    | 6447839647  | 97.41  | 92.74  | 53.78         | 95.85%          |
| CB_60d_2 | 44208538  | 43631108    | 6422153820  | 97.44  | 92.68  | 54.03         | 95.18%          |
| CB_60d_3 | 45358888  | 44857758    | 6614827634  | 97.48  | 92.85  | 53.07         | 95.27%          |

Supplementary Table S3 Total ion number and identification statistics of metabolites

| Ion mode | All peaks | Identified metabolites | Metabolites in Library | Metabolites in KEGG |
|----------|-----------|------------------------|------------------------|---------------------|
| pos      | 7192      | 569                    | 440                    | 197                 |
| neg      | 5272      | 250                    | 214                    | 92                  |

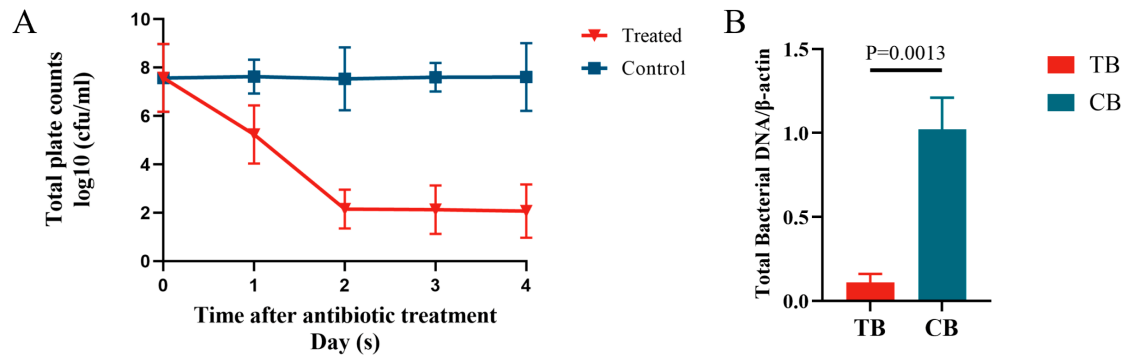

Supplementary Fig. S1 Effect of antibiotic treatment on the intestinal bacterial quantity of *T. ovatus*. (A) Change of bacterial quantity of antibiotic treatment for 4 days. (B) qPCR analysis on the intestine ( $n = 3$ ) was performed using universal primers for total intestinal bacterial genes. Three biological replicates were performed. Error bars indicate the mean values of SD. Significant differences were determined by the Student's *t* test,  $p = 0.0013$ .
